# Supplementary material for: Combining transgenesis with paratransgenesis to fight malaria
Source: eLife journal article supplement (doi:10.7554/elife.77584), 2022-10-03
Supplement: data1 [file Appendix 1-Figure 2-source data.xlsx]

## Sheet: Female survival
Days	WT			Mg			Sg			E			Mg/E			Sg/E			Mg/Sg/E
0	100	100	100	100	100	100	100	100	100	100	100	100	100	100	100	100	100	100	100	100	100
2	100	99	100	100	100	100	100	99	100	100	100	100	100	98	100	100	100	100	100	100	100
4	94	98	96	97	96	98	97	99	96	99	100	96	98	96	95	100	100	98	96	98	100
7	89	96	91	95	90	92	92	94	91	96	98	93	92	90	91	94	96	95	92	96	98
9	86	93	87	90	84	86	89	87	85	91	93	87	88	84	88	90	91	92	88	92	94
11	77	86	78	86	76	82	82	81	76	84	88	80	82	75	81	86	85	89	81	84	89
14	71	81	75	79	69	74	75	76	69	76	82	73	77	69	78	79	77	84	77	80	86
16	64	76	68	72	61	68	70	68	61	70	76	66	71	63	72	74	72	80	70	73	81
18	58	72	62	66	52	61	61	62	54	62	66	62	67	54	65	70	62	76	63	67	76
21	50	64	56	58	44	52	55	54	49	58	60	57	58	48	59	66	56	70	55	61	70
23	45	59	43	53	36	43	47	48	42	50	52	49	49	39	52	60	50	62	48	54	62
26	34	45	32	39	25	33	37	41	34	39	43	40	41	30	45	54	42	57	39	43	54
28	28	40	26	35	18	26	32	35	29	31	35	31	32	20	39	48	36	49	34	37	48
31	21	32	17	26	9	12	21	28	19	22	30	21	24	13	32	44	29	39	27	29	38
33	17	26	14	21	6	7	16	23	12	11	26	18	21	9	26	38	25	35	23	26	33
36	11	20	6	16	5	6	10	16	6	9	19	12	17	5	18	29	19	32	17	20	27
38	6	18	3	11	3	2	6	13	4	5	17	9	13	3	17	27	16	26	15	16	24
41	2	12	3	3	0	2	4	8	3	3	13	4	8	1	12	19	10	25	8	9	18
43	0	8	2	1		1	3	5	3	1	11	3	6	0	11	17	4	19	7	7	15
46		5	1	0		0	3	1	1	0	6	2	5		9	13	4	17	3	2	10
48		4	1				2	0	1		5	1	3		5	10	2	14	1	1	4
51		1	0				0		1		3	1	2		2	6	1	8	0	1	4
53		1							0		2	0	2		1	4	1	8		0	3
	Percentage of suvival										2		2		0	3	0	5			2
											2		0			1		4			2
											1					0		2			0
																		1

## Sheet: Male survival
Days	WT			Mg			Sg			E			Mg/E			Sg/E			Mg/Sg/E
0	100	100	100	100	100	100	100	100	100	100	100	100	100	100	100	100	100	100	100	100	100
2	97	96	97	95	98	94	93	97	94	96	96	95	94	95	97	96	95	96	97	96	94
4	90	89	90	87	92	88	86	92	87	90	91	89	87	90	92	92	90	91	92	90	87
7	79	82	81	72	80	75	73	80	76	78	80	76	77	80	78	80	76	78	81	79	82
9	63	64	69	66	70	62	61	65	60	65	68	62	68	64	62	65	70	69	68	67	69
11	45	49	55	53	58	50	46	56	42	52	54	48	55	52	47	56	61	60	57	54	56
14	36	37	41	38	49	38	34	43	31	41	42	39	46	41	34	43	49	46	49	40	43
16	27	26	32	22	34	26	29	32	19	30	27	24	34	27	22	32	36	35	38	26	31
18	18	13	21	13	23	12	17	26	9	16	18	12	24	14	9	24	27	23	24	12	19
21	9	6	13	4	12	5	8	16	3	7	11	4	13	6	4	16	15	11	10	3	7
23	5	1	7	0	9	0	6	11	0	2	6	0	7	2	1	8	7	6	4	1	5
26	2	0	4	0	6	0	2	6	0	0	3	0	2	0	1	6	1	2	1	0	0
	Percentage of suvival

## Sheet: Egg number
	WT	Mg	Sg	E	Mg/E	Sg/E	Mg/Sg/E
Egg number/ mosquito	115	36	4	54	73	65	45
	83	85	45	48	2	59	0
	98	69	75	21	115	54	85
	89	29	89	18	21	76	71
	92	0	42	119	98	94	39
	66	101	27	31	86	0	88
	87	72	4	94	88	84	134
	0	66	16	0	82	76	59
	37	18	95	27	96	40	69
	58	84	101	6	91	7	76
	81	132	84	74	84	114	63
	65	10	72	81	2	32	86
	95	99	3	75	96	82	77
	74	72	87	113	66	97	63
	104	66	107	37	61	23	95
	65	109	61	94	77	65	37
	98	32	92	109	83	73	0
	56	60	43	56	72	91	58
	0	75	58	88	0	45	93
	46	93	84	92	56	0	78
	96	15	45	71	93	99	103
	74	89	86	88	0	56	96
	32	78	0	27	78	89	73
	67	129	114	68	82	73	82
	12	64	66	91	96	109	52
	81	37	32	72	87	83	94
	49	72	92	87	27	78	85
	87	0	56	52	69	59	39
	132	93	69	137	86	88	151
	84	76	82	68	113	73	62
	0	48	76	82	93	109	86
	33	99	0	47	88	92	82
	85	3	65	71	83	37	93
	73	106	21	86	70	98	58
	83	94	142	51	99	81	99
	96	67	39	82	76	86	105
	112	84	95	94	34	92	96
	23	103	82	95	127	79	66
	82	67	91	88	93	82	93
	62	96	92	62	80	45	71
	58	78	51	107	67	0	56
	95	24	73	93	48	77	88
	0	110	86	67	29	102	23
	77	67	71	88	62	93	81
	134	91	88	27	89	85	99
	82	47	0	87	107	55	55
	84	88	26	76	84	95	74
	61	54	99	45	91	75	64
	98	91	61	83	82	81	81
	88	30	52	63	78	94	84
	75	127	83	88	86	68	76
	106	67	91	105	68	79	82

## Sheet: hatching rate
	WT	Mg	Sg	E	Mg/E	Sg/E	Mg/Sg/E
percentage of hatching/mosquito	98.2609	80.5556	0	85.1852	97.2603	92.3077	62.2222
	100	96.4706	77.7778	83.3333	0	86.4407	0
	98.9796	94.2029	96	0	97.3913	88.8889	95.2941
	92.1348	0	94.382	0	0	100	92.9578
	98.913	0	61.9048	92.437	94.898	96.8085	58.9744
	95.4545	97.0297	0	54.8387	95.3488	0	95.4545
	100	100	0	97.8723	95.4545	95.2381	96.2686
	0	96.9697	0	0	92.6829	94.7368	93.2203
	67.5676	0	98.9474	70.3704	93.75	80	91.3043
	96.5517	98.8095	97.0297	0	92.3077	0	94.7368
	100	93.9394	97.6191	97.2973	95.2381	92.9825	93.6508
	96.9231	0	94.4444	96.2963	0	50	96.5116
	97.8947	97.9798	0	96	95.8333	93.9024	93.5065
	100	100	97.7011	96.4602	96.9697	95.8763	88.8889
	100	96.9697	95.3271	62.1622	95.082	0	95.7895
	95.3846	99.0826	93.4426	97.8723	98.7013	89.2308	64.8649
	95.9184	84.375	97.8261	95.4128	97.5904	95.8904	0
	96.4286	96.6667	88.3721	91.0714	97.2222	94.5055	86.2069
	0	97.3333	87.931	95.4545	0	62.2222	100
	73.913	98.9247	96.4286	97.8261	85.7143	0	94.8718
	95.8333	0	93.3333	91.5493	98.9247	93.9394	97.0874
	97.2973	100	95.3488	93.1818	0	91.0714	100
	59.375	97.4359	0	0	98.718	92.1348	86.3014
	97.0149	97.6744	94.7368	94.1176	97.561	95.8904	96.3415
	0	96.875	93.9394	92.3077	95.8333	93.578	82.6923
	96.2963	59.4595	56.25	97.2222	91.954	100	93.617
	93.8775	100	94.5652	91.954	0	96.1539	96.4706
	95.4023	0	100	90.3846	86.9565	94.9153	82.0513
	96.9697	97.8495	97.1014	97.8102	94.186	94.3182	98.6755
	97.6191	97.3684	98.7805	94.1176	94.6903	95.8904	93.5484
	0	47.9167	93.421	98.7805	92.4731	93.578	96.5116
	81.8182	95.9596	0	72.3404	90.9091	97.8261	95.1219
	98.8235	0	93.8461	95.7746	91.5663	64.8649	96.7742
	97.2603	98.1132	0	94.186	100	94.898	82.7586
	96.3855	97.8723	94.3662	88.2353	89.899	95.0617	93.9394
	94.7917	100	64.1026	98.7805	94.7368	95.3488	95.2381
	92.8571	97.6191	95.7895	95.7447	50	97.8261	97.9167
	0	98.0583	96.3415	95.7895	98.4252	97.4684	93.9394
	95.1219	98.5075	92.3077	93.1818	96.7742	100	96.7742
	96.7742	93.75	100	91.9355	97.5	64.4444	92.9578
	91.3793	89.7436	90.1961	93.4579	89.5522	0	89.2857
	95.7895	0	100	95.6989	50	93.5065	98.8636
	0	93.6364	95.3488	94.0298	58.6207	99.0196	0
	93.5065	95.5224	95.7746	94.3182	85.4839	98.9247	93.8272
	96.2686	95.6044	95.4545	40.7407	92.1348	94.1176	94.9495
	97.561	61.7021	0	96.5517	96.2617	94.5455	90.9091
	96.4286	95.4545	0	92.1053	90.4762	96.8421	95.9459
	93.4426	92.5926	95.9596	84.4444	94.5055	93.3333	96.875
	94.898	91.2088	95.082	93.9759	93.9024	96.2963	95.0617
	97.7273	63.3333	82.6923	88.8889	89.7436	96.8085	95.2381
	97.3333	93.7008	98.7952	90.9091	97.6744	91.1765	96.0526
	97.1698	97.0149	93.4066	98.0952	83.8235	98.7342	93.9024

## Sheet: feeding rate
	WT			Mg			Sg			E			Mg/E			Sg/E			Mg/Sg/E
Percentage of feeding	90		96	93	97	94	96	91	98	93	95	95	98	94	92	96	94	90	94	98	90

## Sheet: Feeding size 410 nm
	CTRL			WT			Mg			Sg			E			Mg/E			Sg/E			Mg/Sg/E
OD410	0.008	0.012	0.002	1.234	0.906	1.128	0.746	1.308	1.002	1.462	0.946	1.124	0.844	1.004	1.2006	1.328	1.202	0.946	0.884	0.968	1.206	0.768	1.372	0.924
							P value
							0.727484			0.64972			0.632124			0.664293			0.635151			0.756994
