# Supplementary material for: Combining transgenesis with paratransgenesis to fight malaria
Source: eLife journal article supplement (doi:10.7554/elife.77584), 2022-10-03
Supplement: data1 [file Appendix 1-Figure 4B-source data-blood feeding in feeder.xlsx]

## Sheet: Sheet1
Midgut	4100	7600	5600	4300	7500	8500	3500	4800	5300	6400
Ovary	225	342	312	410	178	166	220	350	300	210
Blood in feeder	0	0	0	0	0	0	0	0	0	0
Blood alone	0	0	0	0	0	0	0	0	0	0
