# Supplementary material for: Combining transgenesis with paratransgenesis to fight malaria
Source: eLife journal article supplement (doi:10.7554/elife.77584), 2022-10-03
Supplement: data1 [file Fig 2ABCDE-source data.xlsx]

## Sheet: female midgut
	F1 no blood			F1 blood fed			F2 no blood			F2 blood fed			F3 no blood			F3 blood fed
WT	3400	6500	7100	47000	114000	201000	2300	4800	1620	18800	72000	38000	960	1680	2100	5600	24000	19600
Trans	1920	5400	3600	51000	82000	147000	3200	1120	940	23600	62000	13800	382	940	1420	8200	9600	13200

## Sheet: Ovary
	F1 no blood			F1 blood fed			F2 no blood			F2 blood fed			F3 no blood			F3 blood fed
WT	77	349	216	620	1090	1620	59	118	125	290	790	620	38	78	124	268	720	520
Trans	208	116	58	1370	830	920	151	76	49	660	430	568	56	106	72	388	520	360

## Sheet: Male midgut
	F1			F2			F3
WT	2620	1260	1980	1360	740	630	1250	324	270
Trans	1600	2700	1340	830	1150	810	368	584	492

## Sheet: Accessory gland
	F1			F2			F3
WT	2620	1260	1980	1360	740	630	1250	324	270
Trans	1600	2700	1340	830	1150	810	368	584	492

## Sheet: Serratia transmission   
	Serratia transmission-male to virgin female
	Spermatheca									Midgut									Ovary
WT	0	2	7	16	1	4	2	0	3	76	220	130	410	0	120	65	180	43	8	21	13	24	8	0	7	16	2
Trans	11	0	1	3	1	3	1	7	2	49	340	27	110	0	68	74	268	72	4	7	5	0	16	9	1	6	13
