# Supplementary material for: Combining transgenesis with paratransgenesis to fight malaria
Source: eLife journal article supplement (doi:10.7554/elife.77584), 2022-10-03
Supplement: data1 [file Fig 3A and B- source data.xlsx]

## Sheet: Oocyst 3 experiments
WT	Mg/E	Sg/E	Mg/Sg/E	Serratia	Serratia AS-ploy	Mg/Sg/E+Serratia AS-ploy
7	1	2	1	3	1	0
3	3	7	0	6	1	0
8	2	4	14	7	6	6
7	1	3	0	1	0	0
21	6	1	0	3	0	0
8	1	1	1	5	1	3
2	2	12	2	7	4	1
6	0	6	0	13	1	0
2	2	1	13	6	0	0
11	3	7	0	3	4	0
8	16	3	2	5	2	2
7	2	8	0	1	7	1
8	1	2	1	3	8	0
3	2	10	0	8	1	0
11	1	6	9	3	1	0
2	0	1	0	7	1	0
1	2	4	1	11	0	1
8	1	8	0	9	0	7
3	6	2	0	6	2	2
4	9	2	9	2	1	1
2	1	3	1	1	1	0
24	0	9	0	8	0	2
5	2	2	1	6	1	1
1	1	3	1	3	6	0
8	3	4	0	7	2	0
16	0	13	3	9	7	1
22	0	5	0	1	3	3
4	7	2	0	2	1	1
9	1	1	1	6	2	0
5	1	9	0	2	8	0
2	1	6	0	1	1	0
13	4	2	0	4	1	3
4	1	6	0	8	2	0
6	0	4	2	7	6	0
9	14	2	0	6	0	0
13	2	7	4	1	0	0
8	1	8	2	9	2	7
8	2	12	1	11	4	0
8	0	2	0	5	1	0
5	5	3	1	8	0	0
10	3	3	0	7	2	1
7	1	7	0	5	2	2
11	1	3	2	3	2	0
2	7	0	2	6	4	0
12	2	4	3	5	3	0
10	7	3	0	2	2	0
4	8	2	1	4	1	0
8	0	2	0	5	0	1
8	1	4	2	6	0	4
24	1	13	0	4	2	2
13	2	1	4	1	1	0
4	0	2	0	3	3	0
7	1	1	0	6	0	0
23	7	1	1	7	1	1
8	2	3	7	2	6	0
6	1	4	2	8	2	0
7	2	4	1	10	7	5
11	7	19	0	6	1	1
8	3	2	0	7	1	1
6	0	8	1	4	1	0
13	2	2	0	2	8	0
5	2	11	1	5	1	0
3	1	2	2	6	1	0
7	7	6	3	0	3	0
5	1	4	0	1	1	0
2	0	1	1	4	0	12
1	13	0	0	3	2	4
7	1	5	0	6	1	0
8	1	1	3	9	7	1
0	0	21	0	8	0	0
2	7	0	0	3	2	1
6	3	0	2	0	1	1
14	1	0	0	0	3	0
5	0	12	3	1	14	8
8	4	2	0	4	2	0
2	6	8	0	3	1	2
2	11	4	0	3	4	11
28	1	4	1	6	0	0
2	0	2	4	3	0	2
8	3	1	0	0	12	8
12	1	6	0	4	2	3
4	3	2	0	21	6	0
10	2	6	7	3	2	0
0	0	4	0	7	0	4
3	1	12	1	0	1	2
11	6	7	0	3	0	1
9	1	2	13	8	3	2
7	2	6	0	1	9	1
6	0	2	1	12	1	3
5	0	0	2	0	0	7
17	1	6	0	6	1
8	3	2	1		4
9	0	4	0		1
11	10		1
6			0
11			0
7			0
11			1
10
1
16

## Sheet: Sporozoite  3 experiments
WT	Mg/E	Sg/E	Mg/Sg/E	Serratia	Serratia AS-ploy	Mg/Sg/E+Serratia AS-ploy
12	10.2	0	0	2.4	4.2	0	Mean	8.04615	4.22824	3.3974	1.21304	4.60361	2.81667	0.611392
21	9.6	1.2	0	5.4	1.8	0	STD.S	6.3925	4.46429	4.70266	2.47822	3.68892	3.27689	1.82953
10.2	18.6	3.6	1.2	6.6	0	0
3.6	3	1.8	0.6	9	0	0		8.0±6.4	4.2±4.5	3.4±4.7	1.2±2.5	4.6±3.7	2.8±3.3	0.6±1.8
3.6	2.4	6.6	2.4	0.6	5.4	0.6
2.4	1.2	2.4	0	1.2	0.6	0.3
4.8	3.6	1.2	0	4.2	1.2	0
3	0	1.8	0	0.6	0	0
6.6	1.8	0.6	0	0	0	0
10.2	4.2	0	0.6	4.8	6.6	0
2.4	1.8	2.4	0	2.4	1.8	0
3	1.8	3	0	3.6	0	0.6
3.6	0.6	0	1.2	1.8	7.8	0
0.6	1.2	0	0	7.2	2.4	0
0	0	1.8	5.4	1.8	1.2	1.2
1.8	7.2	4.2	0	2.4	1.8	0.6
4.8	3.6	1.2	9.6	0	0	0
5.4	1.2	6.6	0	0.6	0.6	0
7.2	5.4	4.2	0.6	10.2	0.6	1.2
1.8	6.6	2.4	0	5.4	2.4	0
3	0	18.6	0	4.8	1.8	0
12	3	0	0	1.2	0	0
10.8	0.6	0	0.6	9.6	0	0
13.8	4.2	0	0	0	1.2	0
16.2	3	1.2	1.2	0	4.8	10.2
1.8	4.8	2.4	3.6	4.8	10.8	0
14.4	3.6	10.8	0	4.2	4.2	3.6
1.8	2.4	3.6	0	2.4	8.4	0
19.8	3.6	1.8	0.6	4.2	0	2.4
12.6	10.8	0	0	3	10.8	0
3.6	9.6	1.2	0	2.4	5.4	0
9	15	4.8	0	5.4	0.6	0
4.8	3	1.8	0	6.6	7.2	0
10.2	4.8	0	1.2	9	0	0
13.2	1.2	1.2	1.8	0.6	7.8	0
13.8	3.6	10.8	4.8	12	6.6	0
2.4	0	0.6	0	4.2	1.8	0
3	3.6	0	0	7.2	0	0
3.6	4.2	2.4	6.6	0	7.8	0
0.6	1.8	3	0	4.8	2.4	0
2.4	1.8	0	1.2	2.4	1.2	0
1.8	0.6	0	0	5.4	1.8	1.2
4.8	1.2	1.8	0	10.8	0	0
10.8	0	4.2	1.8	7.2	0.6	0
7.2	7.2	1.2	0	1.8	0.6	4.8
9.6	3.6	6.6	5.4	5.4	2.4	0
3	1.2	4.2	0	6.6	1.8	0
12	5.4	2.4	9.6	9.6	0	0
10.8	6.6	18.6	0	6.6	0	10.8
13.8	0	0	0.6	5.4	1.2	0
16.2	7.2	0	0	7.8	4.8	0
8.4	0.6	0	0	0.6	10.8	0
18	4.8	1.2	0	9.6	6.3	3.6
31.5	3	2.4	0.6	0	2.7	0
15.3	4.8	10.8	0	0	0	0
5.4	7.2	3.6	1.2	4.8	0	0
5.4	15.3	0	3.6	4.2	8.1	0
3.6	4.2	1.8	0	2.4	0.9	0
7.2	27.9	5.4	0	4.2	1.8	0
4.5	4.5	2.7	0.6	2	0	0
9.9	3.6	9.9	0	3.6	0	0
15.3	1.8	3.6	0	8.1	9.9	0
3.6	3	1.8	0	9.9	2.7	0.9
4.5	0	2.7	0	13.5	0	0.9
5.4	1.2	0.9	1.8	0.9	11.7	0
0.9	6.3	0	0.9	1.8	3.6	0
0	2.7	3.6	3.6	6.3	1.8	0
2.7	2.7	4.5	0	0.9	2.7	0
7.2	0.9	0	0	0	0	0
8.1	1.8	0	1.8	7.2	0.9	0.9
10.8	0	2.7	0	3.6	0.9	0
2.7	10.8	6.3	0.9	5.4	3.6	0
4.5	5.4	1.8	0	2.7		1.8
18	1.8	9.9	0	10.8		0.9
16.2	8.1	6.3	1.8	2.7		0
20.7	9.9	3.6	0	3.6		0
24.3	0	27.9	8.1	0		1.8
2.7	4.5		0	0.9		0
	0.9		14.4	15.3		0
	2.1		0	8.1
	4.5		0.9	7.2
	1.8		0	1.8
	5.4		0	14.4
	3.6		0
	2.7		0.9
			0
			1.8
			5.4
			0
			1.8
			0.9
			0
