# Supplementary material for: Combining transgenesis with paratransgenesis to fight malaria
Source: eLife journal article supplement (doi:10.7554/elife.77584), 2022-10-03
Supplement: data1 [file Fig 4BCDE-source data.xlsx]

## Sheet: 3 mosquitoes infection rate
Days	WT			Paratransgenic			Transgenic			Paratransgenic+Transgenic
0	100	100	100	100	100	100	100	100	100	100	100	100
1	100	100	100	100	100	100	100	100	100	100	100	100
2	100	100	100	100	100	100	100	100	100	100	100	100
3	100	100	100	100	100	100	100	100	100	100	100	100
4	100	100	100	100	100	100	100	100	100	100	100	100
5	60	80	80	100	100	100	100	100	100	100	100	100
6	20	40	40	80	80	60	80	80	80	100	100	100
7	0	40	0	60	80	40	80	80	80	80	100	100
8	0	40	0	60	80	40	80	80	60	80	100	100
9	0	20	0	40	60	20	80	80	60	80	100	100
10	0	20	0	40	60	20	80	80	60	80	100	100
11	0	20	0	20	60	20	60	80	60	80	100	100
12	0	0	0	20	60	20	60	80	60	80	100	100
13	0	0	0	20	40	20	60	80	60	80	100	100
14	0	0	0	20	40	20	60	80	60	80	100	100

## Sheet: sporozoite number 3 mosquitoes 
WT mosquito	Paratransgenic	Transgenic	Paratransgenic+transgenic
9.6	10.2	0.6	0
21.3	0	0	6.3
1.2	5.7	1.8	0
10.8	1.2	4.2	1.2
3.6	0	0	0
9.6	0.9	1.2	0
15.9	0.9	1.8	0.9
0.8	2.7	0	0.3
7.2	4.8	5.4	0
13.5	1.2	0	1.5
7.5	3.9	0.9	0
5.4	9.3	0.6	0
8.4	0.6	0	0.6
10.2	1.2	8.7	0
16.8	2.7	1.5	0
6.9	0	0.3	0
4.2	3.3	0	6.6
1.8	7.2	1.2	0
15.3	2.4	0.6	0.6
9.6	1.5	4.8	0
20.7	0	0	0
11.7	4.2	1.5	1.2
9.3	3.6	0	4.2
6.6	0.6	0	0.3
8.7	1.8	3.6	0
3.9	2.4	2.1	1.8
19.8	3	0.9	0.9
2.4	0	0	0
14.4	5.1	2.1	0
8.1	6.3	4.8	0
9.6	3.6	0	0
13.8	6.9	1.2	0
11.2	2.4	1.2	0
1.8	0.9	2.4	1.8
7.8	3.3	0.6	4.8
9.9	1.8	0	0
5.4	2.7	2.7	0
8.1	1.2	0	6.6
10.8	0.6	1.8	0
11.2	3.6	0	1.2
6.3	0.9	0.9	0
7.2	0	1.8	0.3
9.6	1.2	1.2	0
2.7	9.9	0	0
8.4	2.7	0	0
6.3	0	0.6	0
0.9	1.5	0	0.8
14.4	0.9	1.8	3.6
10.7	2.7	2.7	0
3	4.8	0	0
6.6	1.2	5.4	1.4
	3.9	0	0
	0	0.9	1.2
	0.6	0	0
		0	0

## Sheet: 5 mosquitoes infection rate
Days	WT			Paratransgenesis			Transgensis			Paratransgenesis+Transgensis
0	100	100	100	100	100	100	100	100	100	100	100	100
1	100	100	100	100	100	100	100	100	100	100	100	100
2	100	100	100	100	100	100	100	100	100	100	100	100
3	100	100	100	100	100	100	100	100	100	100	100	100
4	100	80	60	100	100	100	100	100	100	100	80	80
5	80	60	60	100	80	80	100	100	80	100	80	80
6	40	20	40	80	60	80	80	80	80	100	80	80
7	20	0	40	60	40	40	80	60	80	100	60	80
8	20	0	20	60	20	40	80	60	60	100	60	80
9	0	0	20	60	20	40	60	40	40	100	60	80
10	0	0	20	60	20	20	60	40	40	100	60	80
11	0	0	20	40	20	20	60	40	40	100	60	80
12	0	0	20	40	20	20	60	40	40	100	60	80
13	0	0	20	40	20	20	60	40	40	100	60	80
14	0	0	20	40	20	20	60	40	40	100	60	80

## Sheet: sporozoite number  5 mosquitoes
WT mosquito	Paratransgenic	Transgenic	Paratransgenic+transgenic
7.2	4.8	4.2	0
0.6	0	0.3	0
1.8	14.4	0	0
2.4	3	10.8	1.8
3.6	4.8	0	0.3
8.7	1.2	0.6	0
4.8	3.6	0	0
10.2	0	0	1.2
13.2	3.6	5.4	0
7.2	4.2	0	1.2
2.4	0.9	1.8	0
3	1.2	0	0
3.6	0.6	7.8	1.8
0.6	1.2	0.3	0
2.4	0	1.2	0
1.8	7.2	1.8	0
4.8	0	0	0
10.8	1.2	0.6	0
7.2	10.2	1.8	6.3
9.6	0	0.6	0
3	5.7	0	1.2
9.6	1.2	1.8	0
21.3	0	4.2	0
1.2	0.9	0	0.9
10.8	0.9	1.2	0.3
3.6	2.7	1.8	0
9.6	4.8	0	1.5
15.9	1.2	5.4	0
0.8	3.9	0	0
7.2	9.3	0.9	0.6
13.5	0.6	1.2	0
7.5	1.2	0	0
5.4	2.7	8.7	0
8.4	0	1.5	6.6
10.2	3.3	0.3	0
16.8	7.2	0	0.6
6.9	2.4	1.2	0
4.2	1.5	0.6	0
1.8	0	4.8	1.2
15.3	4.2	0	4.2
9.6	3.6	1.5	0.3
20.7	0.6	0	0
11.7	1.8	0	1.8
9.3	2.4	3.6	0.9
6.6	3	2.1	0
8.7	0	0.9	0
3.9	5.1	0	0
9.3	3.6	1.2	0
1.2	1.8	0.9	0
4.8	9.3	0	2.4
0.9	0	0.6	0.6
5.4	2.1	3.6	1.8
11.5	0.9	0.3	0
16.5	2.7	2.1	0
4.2	1.5	0.6	6.3
11.7	2.4	0	2.1
2.4	0	0	0.9
1.8	0.6	7.2	0
3	2.7	0.6	0
7.2	0	3	1.2
1.2	4.8	3.6	0.3
0.6	3.3	2.1	0
8.7	8.7	0	0
4.8	1.5	0.3	0
1.8	0.6	1.2	0
2.1	0	2.1	2.4
10.8		0	0
6.3		0.6	0.9
7.5			0.6
			2.7
