# Supplementary material for: Combining transgenesis with paratransgenesis to fight malaria
Source: eLife journal article supplement (doi:10.7554/elife.77584), 2022-10-03
Supplement: data1 [file Fig1C and D-source data-RT-PCR data.xlsx]

## Sheet: Mg expression
		Gene	Cт	Cт Mean			Gene	Cт	Cт Mean								Gene	Cт	Cт Mean		Gene	Cт	Cт Mean
	WT	S7	21.626	21.528			Aper	33.0837	32.9823								Scoprine	Undetermined			MP2	Undetermined
	WT	S7	21.5822	21.528			Aper	32.9357	32.9823								Scoprine	Undetermined			MP2	Undetermined
	WT	S7	21.3758	21.528			Aper	32.9275	32.9823								Scoprine	Undetermined			MP2	Undetermined
	Mg	S7	19.5754	19.3227			Aper	32.9423	33.0008								Scoprine	Undetermined			MP2	Undetermined
	Mg	S7	19.2303	19.3227			Aper	32.9357	33.0008								Scoprine	Undetermined			MP2	Undetermined
	Mg	S7	19.1624	19.3227			Aper	33.1283	33.0008								Scoprine	Undetermined			MP2	Undetermined
	E	S7	21.4446	21.3148			Aper	33.0668	33.1354								Scoprine	Undetermined			MP2	Undetermined
	E	S7	21.3431	21.3148			Aper	33.1649	33.1354								Scoprine	Undetermined			MP2	Undetermined
	E	S7	21.1567	21.3148			Aper	33.1745	33.1354								Scoprine	Undetermined			MP2	Undetermined
	Mg/E	S7	21.4835	21.209			Aper	32.4898	32.6289								Scoprine	27.064			MP2	27.9578
	Mg/E	S7	21.2854	21.209			Aper	32.7493	32.6289								Scoprine	27.2567			MP2	26.7468
	Mg/E	S7	20.8581	21.209			Aper	32.6475	32.6289								Scoprine	27.1259			MP2	26.4033
	Mg-Sg-E	S7	20.8895	20.7422			Aper	31.434	31.5614								Scoprine	25.9882			MP2	26.8547
	Mg-Sg-E	S7	20.6857	20.7422			Aper	31.5371	31.6251								Scoprine	25.8443			MP2	26.463
	Mg-Sg-E	S7	20.6515	20.7422			Aper	31.7131	31.7131								Scoprine	25.411			MP2	25.9454
							WT	11.4577	0.0991504	11.4543
							WT	11.3535
							WT	11.5517
							Mg	13.3669	0.300374	13.6794
							Mg	13.7054
							Mg	13.9659
							E	11.6223	0.197741	11.8206
							E	11.8218
							E	12.0178
							Mg/E	11.0063	0.393367	11.4199							Scoprine	5.58054	0.344661	5.93986	MP2	6.4743	0.56216	5.82697
							Mg/E	11.464									Scoprine	5.97133			MP2	5.46144
							Mg/E	11.7894									Scoprine	6.2677			MP2	5.54519
							Mg-Sg-E	10.5444	0.260107	10.8192							Scoprine	5.09864	0.215155	5.0056	MP2	5.96513	0.346246	5.67879
							Mg-Sg-E	10.8514									Scoprine	5.15857			MP2	5.77728
							Mg-Sg-E	11.0616									Scoprine	4.75958			MP2	5.29398
									ΔΔCт									ΔΔCт				ΔΔCт
								WT	0.00339572
								WT	-0.100805
								WT	0.0974089
								Mg	-0.312518
								Mg	0.0259749
								Mg	0.286544
								E	-0.198319
								E	0.00116094
								E	0.197158
								Mg/E	-0.447931									-5.87374				-4.97998
								Mg/E	0.00967852									-5.48295				-5.99284
								Mg/E	0.335093									-5.18658				-5.90909
								Mg-Sg-E	-0.909856									-6.35564				-5.48915
								Mg-Sg-E	-0.602884									-6.29571				-5.677
								Mg-Sg-E	-0.39265									-6.6947				-6.1603
								WT	0.997649	1.00158	0.0689146							0				0
								WT	1.07237									0				0
								WT	0.93471									0				0
								Mg	1.24187	0.799795	0.556155							0				0
								Mg	0.982157									0				0
								Mg	0.175354									0				0
								E	1.21501	1.39712	0.508205							0				0
								E	1.97129									0				0
								E	1.00507									0				0
								Mg/E	1.36408	1.05004	0.289868							58.637	46.5927	11.2269		31.5591	51.778	17.6019
								Mg/E	0.993314									44.7231				63.6833
								Mg/E	0.792733									36.4179				60.0917
								Mg-Sg-E	1.87886	1.57014	0.286505							81.8912	88.0126	13.5905		44.9157	55.8664	13.9127
								Mg-Sg-E	1.51875									78.5594				51.1621
								Mg-Sg-E	1.3128									103.587				71.5215
							Normalized by Aper expression of WT	WT	0.997649									0				0
								WT	1.07237									0				0
								WT	0.93471									0				0
								Mg	1.24073									0				0
								Mg	0.983962									0				0
								Mg	0.175354									0				0
								E	0.492905									0				0
								E	0.623275									0				0
								E	0.492606									0				0
								Mg/E	1.36408									58.637				31.5591
								Mg/E	0.993314									44.7231				63.6833
								Mg/E	0.792733									36.4179				60.0917
								Mg-Sg-E	1.87886									81.8912				44.9157
								Mg-Sg-E	1.51875									78.5594				51.1621
								Mg-Sg-E	1.3128									103.587				71.5215

## Sheet: Mg normalize
	Aper			Scorpine			MP2
WT	0.997649	1.07237	0.93471	0	0	0	0	0	0
Mg/E	1.36408	0.993314	0.792733	58.637	44.7231	36.4179	31.5591	63.6833	60.0917
Mg/Sg/E	1.87886	1.51875	1.3128	81.8912	78.5594	103.587	44.9157	51.1621	71.5215
	Aper			Scorpine			MP2
WT	0.996078	1.07068	0.933239	0	0	0	0	0	0
Mg/E	1.29907	0.945974	0.754953	55.8424	42.5917	34.6823	30.0551	60.6482	57.2279
Mg/Sg/E	1.19662	0.967272	0.836107	52.1554	50.0335	65.9734	28.6062	32.5845	45.5511
	Mean	STD		Mean	STD		Mean	STD
	1	0.0688059		0	0		0	0
	1	0.276054		44.3722	10.6918		49.3104	16.7631
	1	0.182471		56.0541	8.65564		35.5806	8.86085
Normalized by Aper

## Sheet: Sg expression
		Gene	Cт	Cт Mean								Gene	Cт	Cт Mean			Gene	Cт	Cт Mean		Gene
	WT	S7	20.6431									AAPP	32.5162	31.5162			Scoprine	Undetermined			MP2	Undetermined
	WT	S7	21.1629									AAPP	32.9383	31.9383			Scoprine	Undetermined			MP2	Undetermined
	WT	S7	20.9878									AAPP	31.9836	30.9836			Scoprine	Undetermined			MP2	Undetermined
	Sg	S7	21.9311									AAPP	33.2072	32.2072			Scoprine	Undetermined			MP2	Undetermined
	Sg	S7	21.9407									AAPP	33.8692	32.8692			Scoprine	Undetermined			MP2	Undetermined
	Sg	S7	21.6251									AAPP	33.3726	32.3726			Scoprine	Undetermined			MP2	Undetermined
	E	S7	21.134									AAPP	32.1321	31.1321			Scoprine	Undetermined			MP2	Undetermined
	E	S7	21.2371									AAPP	31.9289	30.9289			Scoprine	Undetermined			MP2	Undetermined
	E	S7	21.4131									AAPP	31.9721	30.9721			Scoprine	Undetermined			MP2	Undetermined
	Sg/E	S7	21.4446									AAPP	31.9344	30.9344			Scoprine	26.5807	27.3129		MP2	28.1831	27.8004
	Sg/E	S7	21.3431									AAPP	31.9522	30.9522			Scoprine	27.4098	27.3129		MP2	27.6556	27.8004
	Sg/E	S7	21.1567									AAPP	31.9081	30.9081			Scoprine	27.9483	27.3129		MP2	27.5625	27.8004
	Mg/Sg/E	S7	20.8895									AAPP	32.9727	31.9727			Scoprine	25.9882	25.7478		MP2	25.8547	26.0877
	Mg/Sg/E	S7	20.6857									AAPP	33.1966	32.1966			Scoprine	25.8443	25.7478		MP2	26.463	26.0877
	Mg/Sg/E	S7	20.6515									AAPP	33.472	32.472			Scoprine	25.411	25.7478		MP2	25.9454	26.0877
												WT	11.8732	11.5481
												WT	11.7755
												WT	10.9958
												Sg	11.2761
												Sg	11.9284
												Sg	11.7475
												E	10.9981
												E	10.6917
												E	10.559
												Sg/E	10.4898					5.1361				6.73857
												Sg/E	10.6091					6.06673				6.31245
												Sg/E	10.7514					6.79153				6.40574
												Mg/Sg/E	12.0831					5.09864				4.96513
												Mg/Sg/E	12.5108					5.15857				5.77728
												Mg/Sg/E	12.8205					4.75958				5.29398
												WT	0.325022
												WT	0.227325
												WT	-0.552347
												Sg	-0.272061
												Sg	0.380319
												Sg	0.199376
												E	-0.549997
												E	-0.856417
												E	-0.989143
												Sg/E	-1.05832					-6.41203	0	0	0	-4.80957
												Sg/E	-0.938992					-5.4814				-5.23568
												Sg/E	-0.796752					-4.7566				-5.14239
												Mg/Sg/E	0.534995					-6.44949				-6.583
												Mg/Sg/E	0.962676					-6.38956				-5.77085
												Mg/Sg/E	1.27238					-6.78855				-6.25415
													AAPP					Scorpin				MP2
												WT	0.798286
												WT	0.854217
												WT	1.46647
												Sg	1.20753
												Sg	0.768268
												Sg	0.870927
												E	1.46408
												E	1.81054
												E	1.98501
												Sg/E	2.08251					85.1554				28.0429
												Sg/E	1.91719					44.6751				37.6787
												Sg/E	1.73719					27.032				35.3193
												Mg/Sg/E	0.690161					87.3955				95.8694
												Mg/Sg/E	0.513104					83.8398				54.6009
												Mg/Sg/E	0.413976					110.55				76.3288
		AAPP
		Scorpin
		MP2

## Sheet: Sg normalize
	AAPP			Scorpine			MP2
WT	0.798286	0.854217	1.46647	0	0	0	0	0	0
Sg/E	2.08251	1.91719	1.73718	85.1554	44.6751	27.032	83.8398	110.55	87.3955
Mg/Sg/E	0.690161	0.513104	0.413976	28.0429	37.6787	35.3193	95.8694	54.6009	76.3288
WT	0.798286	0.854217	1.46647	0	0	0	0	0	0
Sg/E	1.08901	1.00256	0.90843	44.5305	23.3621	14.1359	43.8425	57.8101	45.7019
Mg/Sg/E	1.28026	0.951814	0.76793	82.6045	69.8944	65.5178	177.839	101.285	141.591
	Mean	STD		Mean	STD		Mean	STD
	1.03966	0.370687		0	0		0	0
	1	0.0903179		27.3428	15.5834		49.1182	7.58462
	1	0.25954		72.6722	8.87561		140.238	38.2947
Normalized by AAPP
