# Supplementary material for: Combining transgenesis with paratransgenesis to fight malaria
Source: eLife journal article supplement (doi:10.7554/elife.77584), 2022-10-03
Supplement: data1 [file Fig4- source data-3 mosquitoes P value and half infection time.docx]

WT&paratransgenesis P=0.0066

WT&transgenesis P< 0.0001

WT&paratransgenesis+transgenesis P< 0.0001

WT=5.533+0.477

paratransgenesis=7.091+0.707
