# Supplementary material for: Combining transgenesis with paratransgenesis to fight malaria
Source: eLife journal article supplement (doi:10.7554/elife.77584), 2022-10-03
Supplement: data1 [file Fig4-source data-5 mosquitoes P value and half infection time.docx]

WT&paratransgenesis P=0.0403

WT&transgenesis P= 0.010

WT&paratransgenesis+transgenesis P< 0.0001

WT=5.553 ±0.686 days

paratransgenesis=8.267±0.977 days

transgenesis= 10.067±1.004 days
